# Supplementary material
Source: PubMed Central journal article supplement (PMC4771338)
Supplement: AEM.02983-15_zam999116966so1.pdf [file AEM.02983-15_zam999116966so1.pdf]

**SUPPLEMENTAL DATA**

**Table S1. Primers used in this study**

| <b>Primers name</b>         | <b>Gene (name)</b>    | <b>Primer sequence 5' → 3'</b> | <b>References</b> |
|-----------------------------|-----------------------|--------------------------------|-------------------|
| <i>ehaA</i> <sup>α</sup> -F | z0402 ( <i>ehaA</i> ) | ATATCGGCTAAAGTGGAACAGGTCC      | (1)               |
| <i>ehaA</i> <sup>α</sup> -R |                       | CCTAACGCTAACTCAGAGTTGGTGC      | This study        |
| <i>ehaA</i> <sup>α</sup> -F |                       | GACGGGTGAGCAGAAACAAACC         | (1)               |
| <i>ehaA</i> <sup>α</sup> -R |                       | ATCCAGGTAACCTGTGCTTGCG         | (1)               |
| <i>ehaB</i> <sup>α</sup> -F | z0469 ( <i>ehaB</i> ) | AGTGCATGACTACTGATTGTGCTG       | (1)               |
| <i>ehaB</i> <sup>α</sup> -R |                       | CACATTAACAAACCGCTCTGG          | (1)               |
| <i>ehaB</i> <sup>β</sup> -F |                       | CCGTTGTTCTGCAACAGATGG          | (1)               |
| <i>ehaB</i> <sup>β</sup> -R |                       | TCACCGTTCACATCGTTATCG          | (1)               |
| <i>ehaC</i> <sup>α</sup> -F | yfaL ( <i>ehaC</i> )  | ATGAATGTCGGCGA(T/C)ACGC        | (1)               |
| <i>ehaC</i> <sup>α</sup> -R |                       | AGCGTACCGGA(G/A)GCGATTTG       | (1)               |
| <i>ehaC</i> <sup>β</sup> -F |                       | ATGGTCAGACGCTGAATTTACG         | (1)               |
| <i>ehaC</i> <sup>β</sup> -R |                       | TCCCTTTCTGCCACGCCACG           | (1)               |
| <i>ehaD</i> <sup>α</sup> -F | ypjA ( <i>ehaD</i> )  | CACAACCATAAATGGTGGTCG          | (1)               |
| <i>ehaD</i> <sup>α</sup> -R |                       | TCTTTCTCAACAACCTGCCG           | (1)               |
| <i>ehaD</i> <sup>β</sup> -F |                       | ATTCTCTGGGCGGCTATGCC           | (1)               |
| <i>ehaD</i> <sup>β</sup> -R |                       | TTCCACGGGGATTCCACACC           | (1)               |
| <i>ehaG</i> <sup>α</sup> -F | z5029 ( <i>ehaG</i> ) | GTGGAATGTTGTCGTCGTTTGGG        | This study        |
| <i>ehaG</i> <sup>α</sup> -R |                       | CTCTCGACTGGCTACCATTA           | This study        |
| <i>ehaG</i> <sup>β</sup> -F |                       | AATACCCAGAGCATTACTAACCTG       | (2)               |
| <i>ehaG</i> <sup>β</sup> -R |                       | TTGGGTCTACAAATTACAAGGT         | (2)               |
| <i>saa</i> -F               | LH0174 ( <i>saa</i> ) | CGTGATGAACAGGCTATTGC           | (3)               |
| <i>saa</i> -R               |                       | ATGGACATGCCTGTGGCAAC           | (3)               |
| <i>espP</i> -F              | L7020 ( <i>espP</i> ) | AAACAGCAGGCACTTGAACG           | (4)               |
| <i>espP</i> -R              |                       | GGAGTCGTGTCAGTCAGTAGAT         | (4)               |
| yejO-F                      | z3449 ( <i>yejO</i> ) | CTAACACTCCACAATCCGTC           | This study        |
| yejO-R                      |                       | CGCAAATTACCCCTTCAACC           | This study        |

|                 | <b>Primers name</b>   | <b>Gene (name)</b>                  | <b>Primer sequence 5' → 3'</b> | <b>References</b> |
|-----------------|-----------------------|-------------------------------------|--------------------------------|-------------------|
| <b>Fimbriae</b> | <i>loc1-F</i>         | z0024                               | CTGGTCTCATTCTGGTCA             | This study        |
|                 | <i>loc1-R</i>         |                                     | GGATGTCGATCAAGGAAC             | This study        |
|                 | <i>loc2-F</i>         | z0152 ( <i>yadN O157</i> )          | AAAAGCACTTCTCGCAGC             | This study        |
|                 | <i>loc2-R</i>         |                                     | GGCTGTTCGGTGCTTTAA             | This study        |
|                 | <i>loc2b-F</i>        | ECO26_0144 ( <i>yadN nonO157</i> )  | TTGCTGTTTGGTCTGCGA             | This study        |
|                 | <i>loc2b-R</i>        |                                     | CAGTGGTCTGGTTGTTGA             | This study        |
|                 | <i>loc3-F</i>         | z0686 ( <i>sfmA</i> )               | GCGGTACAATTCACCTTTGAAGG        | (5)               |
|                 | <i>loc3-R</i>         |                                     | CATTTGCTTGCCCTGCTGATGC         | (5)               |
|                 | <i>loc4-F</i>         | z0872 ( <i>ybgD</i> )               | TGTTCCATCCAGGCAAAG             | This study        |
|                 | <i>loc4-R</i>         |                                     | GTGAAGTTATTGAAGCACC            | This study        |
|                 | <i>loc5-F</i>         | z1286 ( <i>yebQ</i> )               | CTGTGGTATGTGCAACGTCC           | (5)               |
|                 | <i>loc5-R</i>         |                                     | CCCCGTAGCGATATAATCAAC          | (5)               |
|                 | <i>loc6-F</i>         | z1538                               | CCTACAGTCACTTTTCAGGG           | (5)               |
|                 | <i>Loc6-R</i>         |                                     | GATTAATTAGAGGTAGCTCAGG         | (5)               |
|                 | <i>loc7-F</i>         | z2206                               | CCAGTATTTTTCCATTACGC           | This study        |
|                 | <i>loc7-R</i>         |                                     | CCGGTGGAGTTGTCATAA             | This study        |
|                 | <i>loc8-F</i>         | z1676 to z1677 ( <i>csgA-CsgC</i> ) | CAGGTGTTGTTCCTCAGT             | This study        |
|                 | <i>loc8-R</i>         |                                     | AAAGTGCCGCAAGGAGTAA            | This study        |
|                 | <i>loc9-F</i>         | z3277 ( <i>yehB</i> )               | TACCGAAGGTGATTGTGC             | This study        |
|                 | <i>loc9-R</i>         |                                     | GATGCTTATGTCAATGGGC            | This study        |
|                 | <i>Loc10-F</i>        | z3601                               | CTGCTTCGCTTTGCCTTT             | This study        |
|                 | <i>Loc10-R</i>        |                                     | CTGGAAGTTGATATGGGTG            | This study        |
|                 | <i>Loc11-F</i>        | z4498 ( <i>yraH</i> )               | CTTTTCGCAGGTAATGCCG            | (5)               |
|                 | <i>Loc11-R</i>        |                                     | TTAACGACAGCGTCTGCTTC           | This study        |
| <i>loc12-F</i>  | z4968                 | GTAACCRACGCGGGTATCAA                | This study                     |                   |
| <i>loc12-R</i>  |                       | GCAGCAGGATTACTGGAA                  | This study                     |                   |
| <i>loc13-F</i>  | z5222 to z5224        | GAGGATAAAAGCAAASC GCC               | This study                     |                   |
| <i>loc13-R</i>  |                       | TCATCGGTMTGCCAGTAT                  | This study                     |                   |
| <i>loc14-F</i>  | z5913 ( <i>fimI</i> ) | GTCGTTGCTGCCAATGTTTGC               | (5)                            |                   |
| <i>loc14-R</i>  |                       | GAAATGTAGCGAAGTAGAGCC               | (5)                            |                   |

**Table S2. Number of STEC colonies positive for Congo red or calcofluor staining classified by seropathotypes.**

| Seropathotype <sup>b</sup> | M9-Congo Red <sup>a</sup> |     |      |     |                | M9-Calcofluor <sup>a</sup> |     |      |     |                |
|----------------------------|---------------------------|-----|------|-----|----------------|----------------------------|-----|------|-----|----------------|
|                            | 30°C                      |     | 37°C |     | All conditions | 30°C                       |     | 37°C |     | All conditions |
|                            | 24h                       | 48h | 24h  | 48h |                | 24h                        | 48h | 24h  | 48h |                |
| <b>A (15)</b>              | 0                         | 9   | 7    | 15  | 15             | 0                          | 2   | 0    | 1   | 3              |
| <b>B (21)</b>              | 5                         | 12  | 10   | 19  | 19             | 2                          | 9   | 7    | 8   | 11             |
| <b>C (3)</b>               | 0                         | 3   | 1    | 2   | 3              | 0                          | 1   | 0    | 0   | 1              |
| <b>Total (39)</b>          | 5                         | 24  | 18   | 36  | 37             | 2                          | 12  | 7    | 9   | 15             |

<sup>a</sup> Results are average for 3 independent biological replicates.

<sup>b</sup> Number in parentheses indicates number of isolates.

**Table S3. Serotype distribution of autotransporter and fimbrial genes among STEC strains.**

| Serotype     | No of strains | No. of strains positive by PCR for autotransporters genes: |                          |                          |                          |                          |                          |                          |                          |                          |                          |             |              |                |            |
|--------------|---------------|------------------------------------------------------------|--------------------------|--------------------------|--------------------------|--------------------------|--------------------------|--------------------------|--------------------------|--------------------------|--------------------------|-------------|--------------|----------------|------------|
|              |               | <i>ehaA</i> <sup>α</sup>                                   | <i>ehaA</i> <sup>β</sup> | <i>ehaB</i> <sup>α</sup> | <i>ehaB</i> <sup>β</sup> | <i>ehaC</i> <sup>α</sup> | <i>ehaC</i> <sup>β</sup> | <i>ehaD</i> <sup>α</sup> | <i>ehaD</i> <sup>β</sup> | <i>ehaG</i> <sup>α</sup> | <i>ehaG</i> <sup>β</sup> | <i>saa</i>  | <i>espP</i>  | <i>yejO</i>    |            |
| O157:H7 (A)  | 14            | 14                                                         | 14                       | 14                       | 14                       | 14                       | 14                       | 14                       | 14                       | 14                       | 14                       | 0           | 14           | 14             |            |
| O157:NM (A)  | 1             | 1                                                          | 1                        | 1                        | 1                        | 1                        | 1                        | 0                        | 1                        | 0                        | 1                        | 0           | 1            | 1              |            |
| O157:H26 (C) | 1             | 0                                                          | 0                        | 0                        | 1                        | 1                        | 1                        | 1                        | 1                        | 1                        | 0                        | 0           | 0            | 1              |            |
| O26:H11 (B)  | 4             | 4                                                          | 4                        | 0                        | 4                        | 4                        | 4                        | 0                        | 0                        | 4                        | 4                        | 0           | 4            | 4              |            |
| O45:H2 (B)   | 4             | 4                                                          | 4                        | 0                        | 4                        | 4                        | 4                        | 0                        | 0                        | 4                        | 4                        | 0           | 0            | 4              |            |
| O103:H2 (B)  | 1             | 1                                                          | 1                        | 0                        | 1                        | 1                        | 1                        | 1                        | 1                        | 1                        | 1                        | 0           | 1            | 1              |            |
| O111:H8 (B)  | 1             | 1                                                          | 1                        | 0                        | 0                        | 1                        | 1                        | 0                        | 0                        | 1                        | 1                        | 0           | 0            | 1              |            |
| O111:NM (B)  | 4             | 4                                                          | 4                        | 0                        | 4                        | 4                        | 4                        | 0                        | 0                        | 4                        | 4                        | 0           | 0            | 4              |            |
| O121:H19 (B) | 4             | 4                                                          | 4                        | 4                        | 4                        | 4                        | 4                        | 0                        | 0                        | 4                        | 4                        | 0           | 3            | 3              |            |
| O145:H25 (C) | 1             | 1                                                          | 1                        | 0                        | 1                        | 1                        | 1                        | 1                        | 0                        | 1                        | 1                        | 0           | 1            | 1              |            |
| O145:NM (B)  | 3             | 3                                                          | 3                        | 0                        | 3                        | 3                        | 3                        | 1                        | 0                        | 3                        | 3                        | 0           | 2            | 2              |            |
| O113:H21 (C) | 1             | 1                                                          | 1                        | 0                        | 1                        | 1                        | 1                        | 0                        | 0                        | 1                        | 1                        | 1           | 1            | 0              |            |
| <b>Total</b> | <b>39</b>     | <b>38</b>                                                  | <b>38</b>                | <b>19</b>                | <b>38</b>                | <b>39</b>                | <b>39</b>                | <b>15</b>                | <b>17</b>                | <b>38</b>                | <b>38</b>                | <b>1</b>    | <b>27</b>    | <b>36</b>      |            |
|              |               | No. of strains positive by PCR for fimbrial genes:         |                          |                          |                          |                          |                          |                          |                          |                          |                          |             |              |                |            |
|              |               | <i>z0024</i>                                               | <i>yadN</i>              | <i>sfmA</i>              | <i>ybgD</i>              | <i>yebQ</i>              | <i>z1538</i>             | <i>z2206</i>             | <i>sgA-csgC</i>          | <i>yehB</i>              | <i>z3601</i>             | <i>yraH</i> | <i>z4968</i> | <i>z22-z52</i> | <i>fim</i> |
| O157:H7 (A)  | 14            | 14                                                         | 14                       | 14                       | 14                       | 14                       | 14                       | 13                       | 14                       | 14                       | 14                       | 14          | 14           | 13             | 14         |
| O157:NM (A)  | 1             | 1                                                          | 1                        | 1                        | 1                        | 1                        | 1                        | 1                        | 1                        | 1                        | 1                        | 1           | 1            | 1              | 1          |
| O157:H26 (C) | 1             | 0                                                          | 1                        | 1                        | 1                        | 1                        | 0                        | 1                        | 1                        | 1                        | 1                        | 1           | 1            | 0              | 1          |
| O26:H11 (B)  | 4             | 0                                                          | 4                        | 4                        | 4                        | 4                        | 0                        | 3                        | 4                        | 4                        | 4                        | 4           | 4            | 4              | 4          |
| O45:H2 (B)   | 4             | 0                                                          | 4                        | 4                        | 4                        | 4                        | 0                        | 4                        | 4                        | 2                        | 4                        | 4           | 4            | 0              | 4          |
| O103:H2 (B)  | 1             | 0                                                          | 1                        | 1                        | 1                        | 1                        | 0                        | 1                        | 1                        | 1                        | 1                        | 1           | 1            | 0              | 1          |
| O111:H8 (B)  | 1             | 0                                                          | 1                        | 1                        | 1                        | 1                        | 0                        | 1                        | 1                        | 0                        | 1                        | 1           | 1            | 1              | 1          |
| O111:NM (B)  | 4             | 0                                                          | 4                        | 4                        | 4                        | 4                        | 0                        | 4                        | 4                        | 4                        | 4                        | 4           | 4            | 4              | 4          |
| O121:H19 (B) | 4             | 0                                                          | 4                        | 4                        | 4                        | 4                        | 0                        | 4                        | 4                        | 0                        | 4                        | 4           | 4            | 4              | 4          |
| O145:H25 (C) | 1             | 1                                                          | 1                        | 1                        | 1                        | 1                        | 0                        | 1                        | 1                        | 1                        | 1                        | 1           | 1            | 0              | 1          |
| O145:NM (B)  | 3             | 2                                                          | 3                        | 3                        | 3                        | 2                        | 0                        | 3                        | 3                        | 3                        | 3                        | 2           | 2            | 1              | 3          |
| O113:H21 (C) | 1             | 0                                                          | 1                        | 1                        | 1                        | 1                        | 0                        | 1                        | 1                        | 0                        | 1                        | 1           | 0            | 1              | 1          |
| <b>Total</b> | <b>39</b>     | <b>18</b>                                                  | <b>39</b>                | <b>39</b>                | <b>39</b>                | <b>38</b>                | <b>15</b>                | <b>37</b>                | <b>39</b>                | <b>31</b>                | <b>39</b>                | <b>38</b>   | <b>37</b>    | <b>29</b>      | <b>39</b>  |

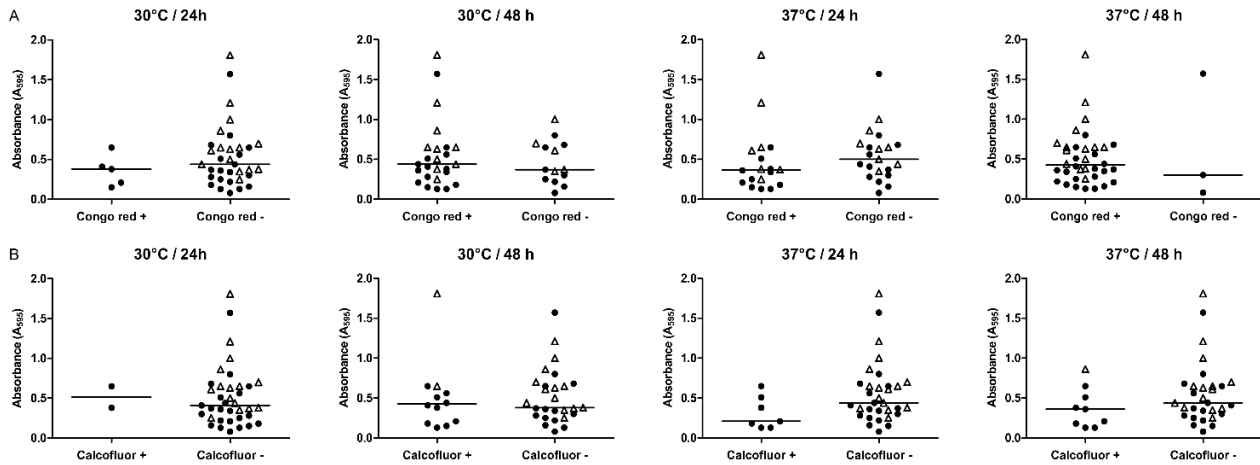

**Figure S1. Biofilm formation and Congo red (A) or calcofluor white staining (B).** The ability to bind CR on M9-CR agar (A) or CF on M9-CF agar (B) after 24 h or 48 h of incubation at 30°C or 37°C was not correlated neither with the 24 h biofilm formed in M9 plus glucose (0.4% wt/vol) in microtiter plates at 30°C, nor with seropathotypes. Open triangles represents seropathotype A isolates and filled dots represents seropathotypes B–C isolates. Results are the average for 3 independent biological replicates. The horizontal bars represent the median. Statistical analysis was performed by using a Mann Whitney test with two-tailed distribution.

## REFERENCES

1. **Wells TJ, Sherlock O, Rivas L, Mahajan A, Beatson SA, Torpdahl M, Webb RI, Allsopp LP, Gobius KS, Gally DL, Schembri MA.** 2008. EhaA is a novel autotransporter protein of enterohemorrhagic *Escherichia coli* O157:H7 that contributes to adhesion and biofilm formation. *Environ Microbiol* **10**:589–604. <http://dx.doi.org/10.1111/j.1462-2920.2007.01479.x>.
2. **Totsika M, Wells TJ, Beloin C, Valle J, Allsopp LP, King NP, Ghigo JM, Schembri MA.** 2012. Molecular characterization of the EhaG and UpaG trimeric autotransporter proteins from pathogenic *Escherichia coli*. *Appl Environ Microbiol* **78**:2179–2189. <http://dx.doi.org/10.1128/AEM.06680-11>.
3. **Paton AW, Srimanote P, Woodrow MC, Paton JC.** 2001. Characterization of Saa, a novel autoagglutinating adhesin produced by locus of enterocyte effacement-negative Shiga-toxigenic *Escherichia coli* strains that are virulent for humans. *Infect Immun* **69**:6999–7009. <http://dx.doi.org/10.1128/IAI.69.11.6999-7009.2001>.
4. **Brunder W, Schmidt H, Frosch M, Karch H.** 1999. The large plasmids of Shiga toxin-producing *Escherichia coli* (STEC) are highly variable genetic elements. *Microbiology* **145** (Pt 5):1005–1014. <http://dx.doi.org/10.1099/13500872-145-5-1005>.
5. **Low AS, Holden N, Rosser T, Roe AJ, Constantinidou C, Hobman JL, Smith DG, Low JC, Gally DL.** 2006. Analysis of fimbrial gene clusters and their expression in enterohaemorrhagic *Escherichia coli* O157:H7. *Environ Microbiol* **8**:1033–1047. <http://dx.doi.org/10.1111/j.1462-2920.2006.00995.x>.
